# Supplementary material for: Wormlike micelles with a unique ladder shape formed by a C22-tailed zwitterionic surfactant bearing a bulky piperazine group
Source: Royal Society of Chemistry journal article supplement (doi:10.1039/c9sm01358j), 2019-01-01
Supplement: c9sm01358j1.pdf [file c9sm01358j1.pdf]

## Electronic Supplementary Information

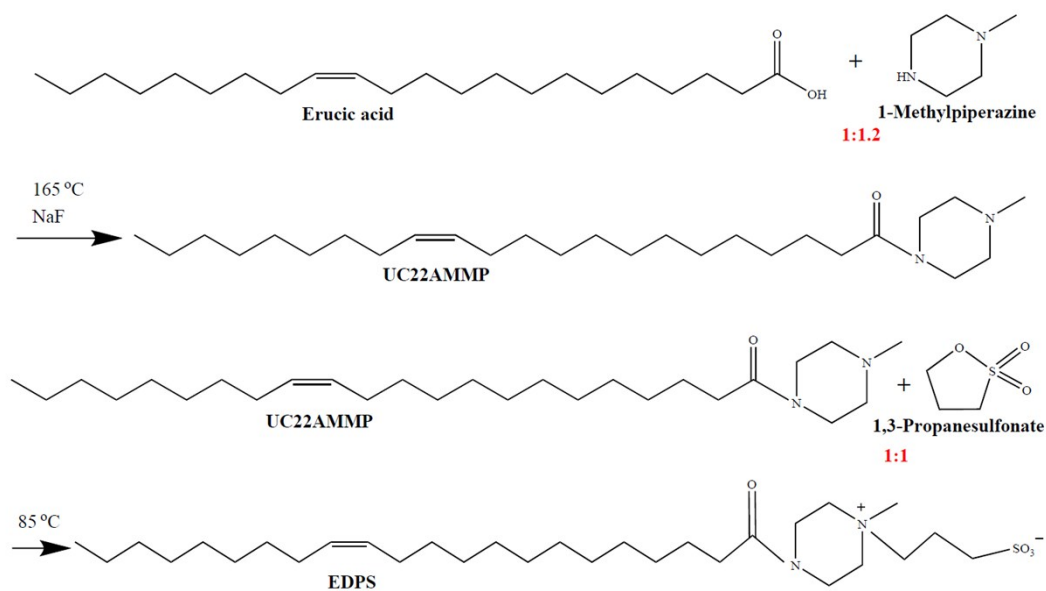

Scheme S1. The synthetic process of EDPS.

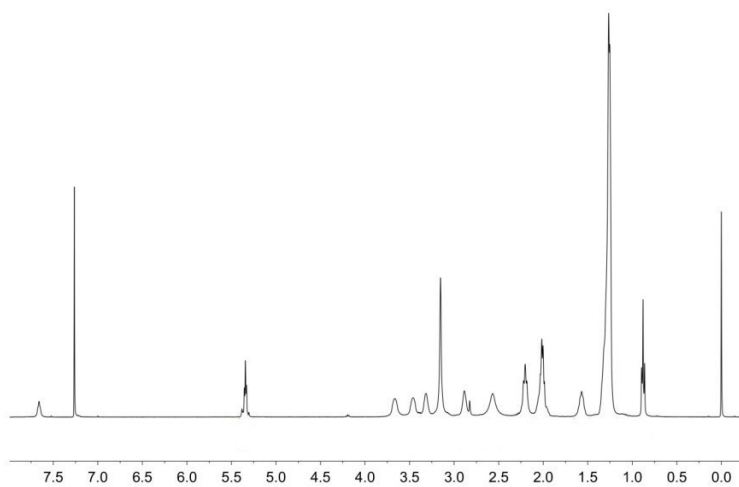

Figure S1.  $^1\text{H}$  NMR spectrum of EDPS in  $\text{CDCl}_3$ .

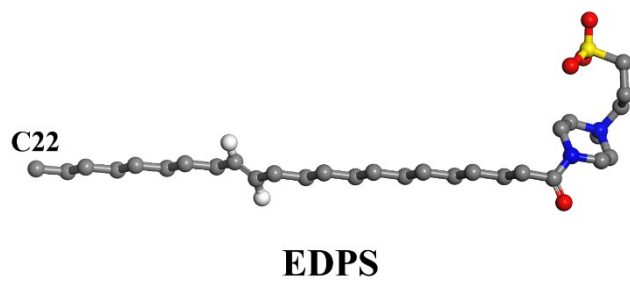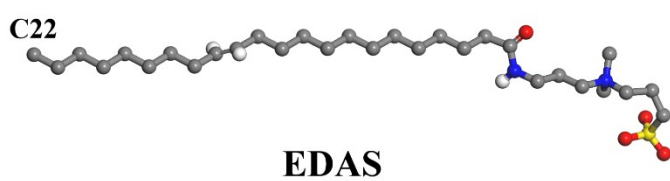

Figure S2. The structures of EDPS and EDAS molecules

Table S1. The viscosity comparison of different C<sub>22</sub>-tailed surfactant systems

| Surfactant               | Concentration<br>(mM) | Viscosity<br>(mPa·s) | Temperature<br>(°C) |
|--------------------------|-----------------------|----------------------|---------------------|
| EDPS                     | 25                    | $\sim 1 \times 10^6$ | 25                  |
| EHAC/NaSal <sup>33</sup> | 60/36                 | $\sim 3 \times 10^3$ | 25                  |
| EDAA <sup>35</sup>       | 30                    | $\sim 2 \times 10^4$ | 25                  |
| UC22AMPM <sup>35</sup>   | 30                    | $\sim 7 \times 10^2$ | 25                  |
| EDAS <sup>40</sup>       | 25                    | $\sim 1 \times 10^4$ | 25                  |

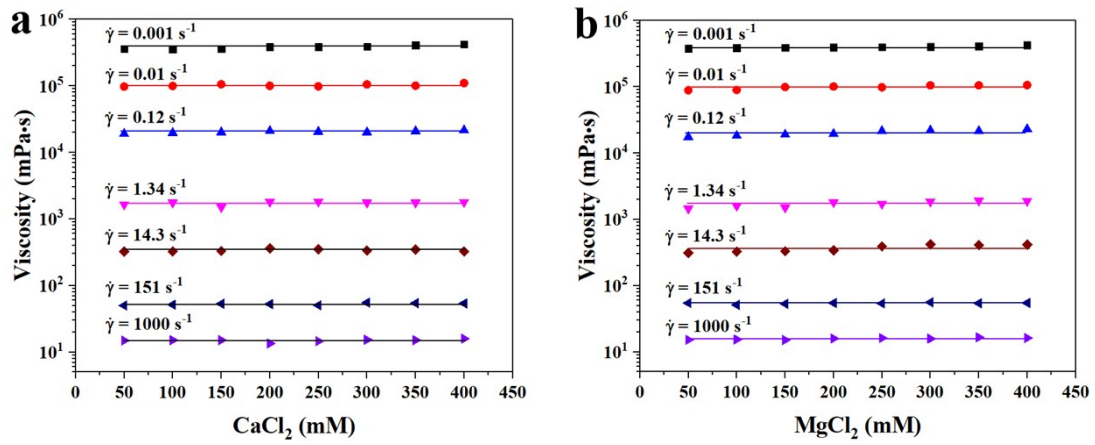

Figure S3. Effects of CaCl<sub>2</sub> (a) and MgCl<sub>2</sub> (b) concentrations on the steady shear viscosity of 25 mM EDPS solution at 25 °C.
